# Supplementary material for: A plasmon-tuned ‘gold sandwich’ for metal enhanced fluorescence in silica coated NaYF4:Yb,Er upconversion nanoparticles
Source: Royal Society of Chemistry journal article supplement (doi:10.1039/c6ra20273j), 2016-01-01
Supplement: c6ra20273j1.pdf [file c6ra20273j1.pdf]

## Electronic supplementary information (ESI)

### A plasmon-tuned 'Gold sandwich' for metal enhanced fluorescence in silica coated $\alpha\text{-NaYF}_4\text{:Yb,Er}$ upconversion nanoparticles

*Robeth Viktoria Manurung, Chien Ting Wu, Pradip Kumar Roy and Surojit Chattopadhyay\**

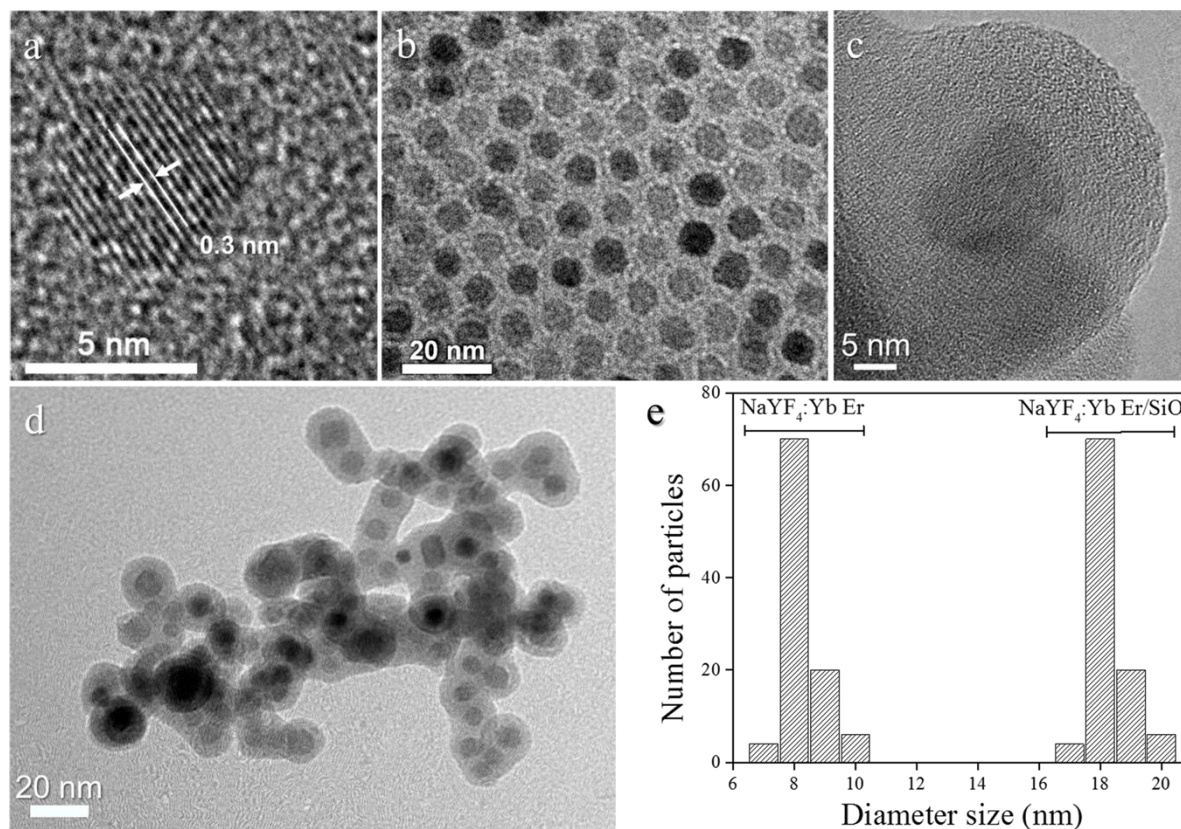

**Figure S1.** Characterization of the UCNPs. a) High, and b) low magnification TEM images of the core  $\alpha\text{-NaYF}_4\text{:Yb,Er}$  nanoparticles. c) High, and d) low magnification TEM images of the  $\alpha\text{-NaYF}_4\text{:Yb,Er}$  nanoparticles coated with a  $\text{SiO}_2$  shell. e) Size distribution histogram of the core, and core-shell type nanoparticles obtained by analyzing the TEM images (n=100).

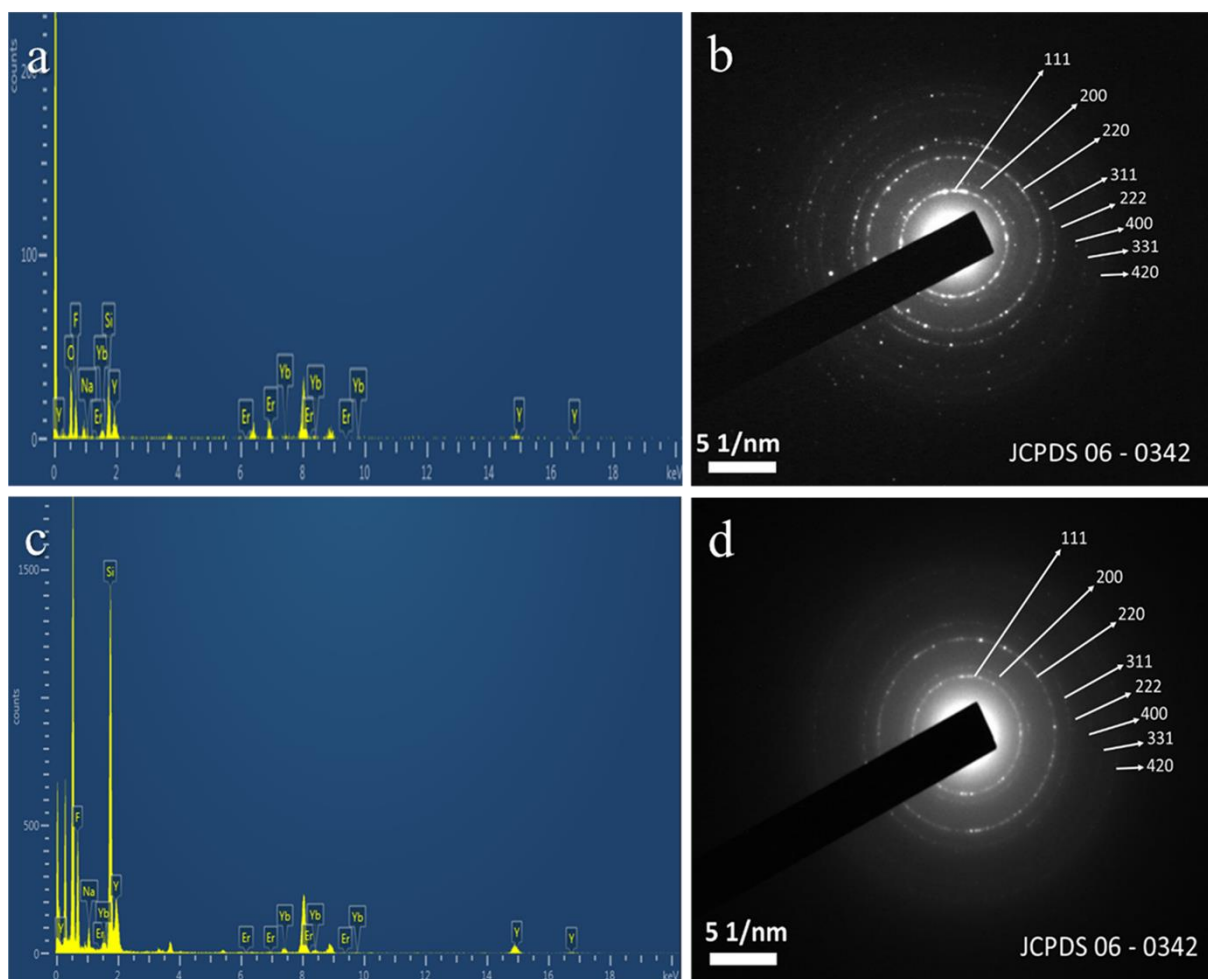

**Figure S2.** a) Energy dispersive X-ray spectroscopy (EDS), and b) selected area electron diffraction (SAED) data of the core, and c) EDS, and d) SAED of the core-shell type  $\alpha$ -NaYF<sub>4</sub>:Yb,Er nanoparticles. Different elemental peaks are identified by their chemical symbols in the EDS, and different diffraction rings are distinguished (by the arrows and Miller indices) according to JCPDS (06-0342).

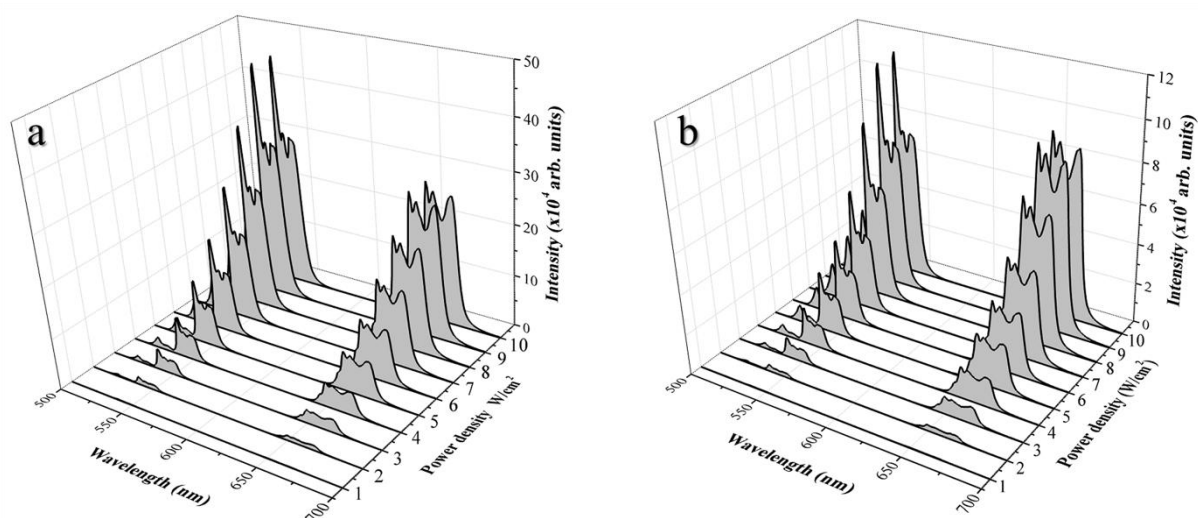

**Figure S3.** Up-conversion spectra emission of a) NaYF<sub>4</sub>:Yb,Er in cyclohexane, and b) NaYF<sub>4</sub>:Yb,Er/SiO<sub>2</sub> in water, under different excitation power density 1-10 Wcm<sup>-2</sup> of 980 nm, respectively.

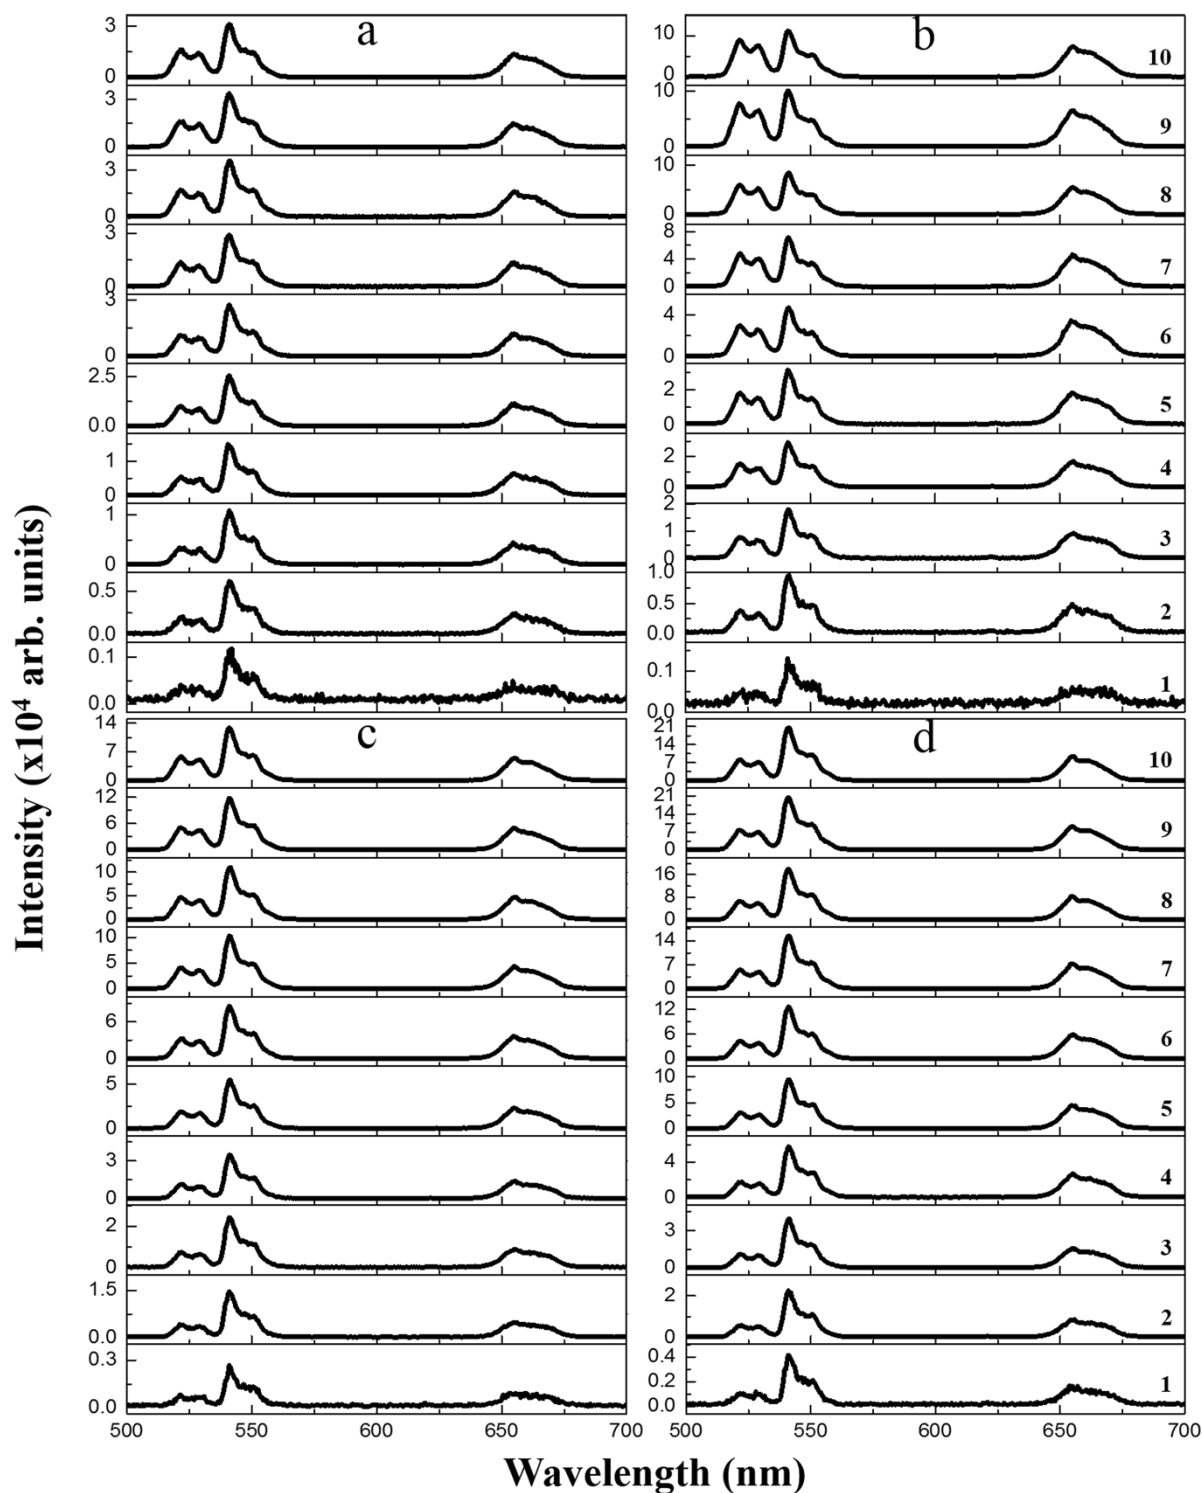

**Figure S4.** Up-conversion emission spectra of NaYF<sub>4</sub>:Yb,Er/SiO<sub>2</sub> on a) Si only (0+0), b) 2 (2+0), c) 4 (4+0) and d) 8 (8+0) minutes gold coated Si substrate under 980 nm excitation with power density range 1 – 10 Wcm<sup>-2</sup>. The numbers on each spectrum represent the power density in Wcm<sup>-2</sup>.

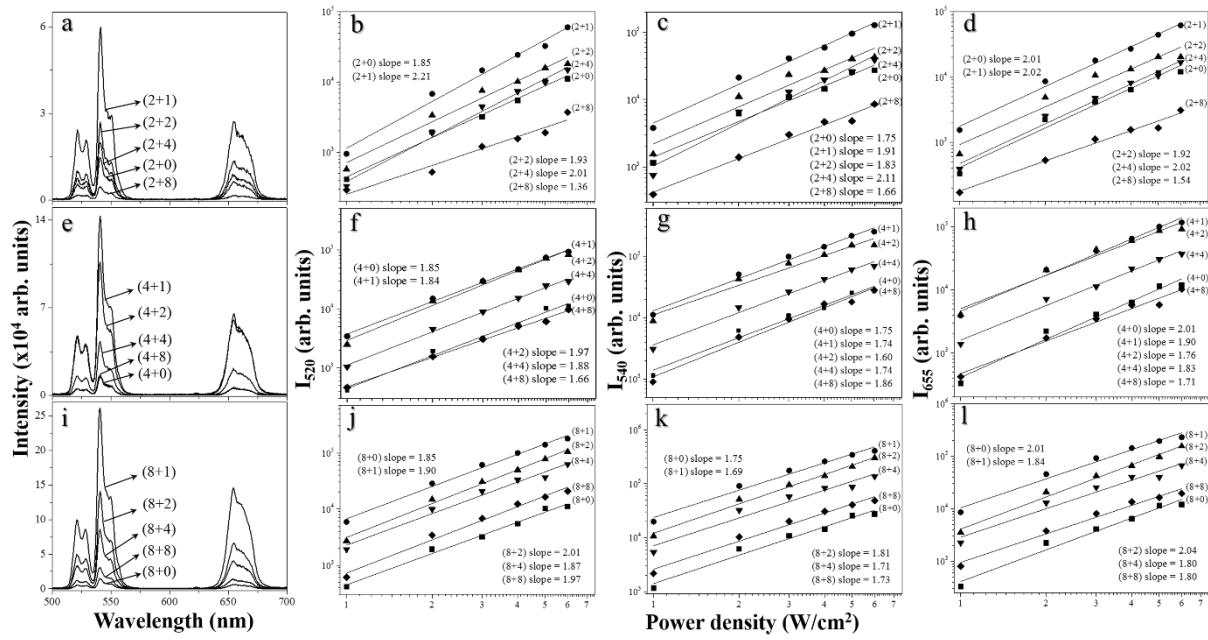

**Figure S5.** Up-conversion luminescence spectra, and power dependence of the 520, 540 and 655 nm signature peaks of  $\text{NaYF}_4:\text{Yb,Er}/\text{SiO}_2$  on (a-d) 2+0, 2+1, 2+2, 2+4, 2+8; (e-h) 4+0, 4+1, 4+2, 4+4, 4+8, and (i-l) 8+0, 8+1, 8+2, 8+4, 8+8 minutes sandwich (bottom and top) gold coating, respectively. Laser power density of  $4 \text{ Wcm}^{-2}$  was used in (a, e and i). The legends in each plot are written in the (B+T) format which represents sputtering time (in minutes) of the bottom and top gold coating, respectively. The slopes, indicating the number of photons involved in the upconversion process, are mentioned against each plot fitted linearly.

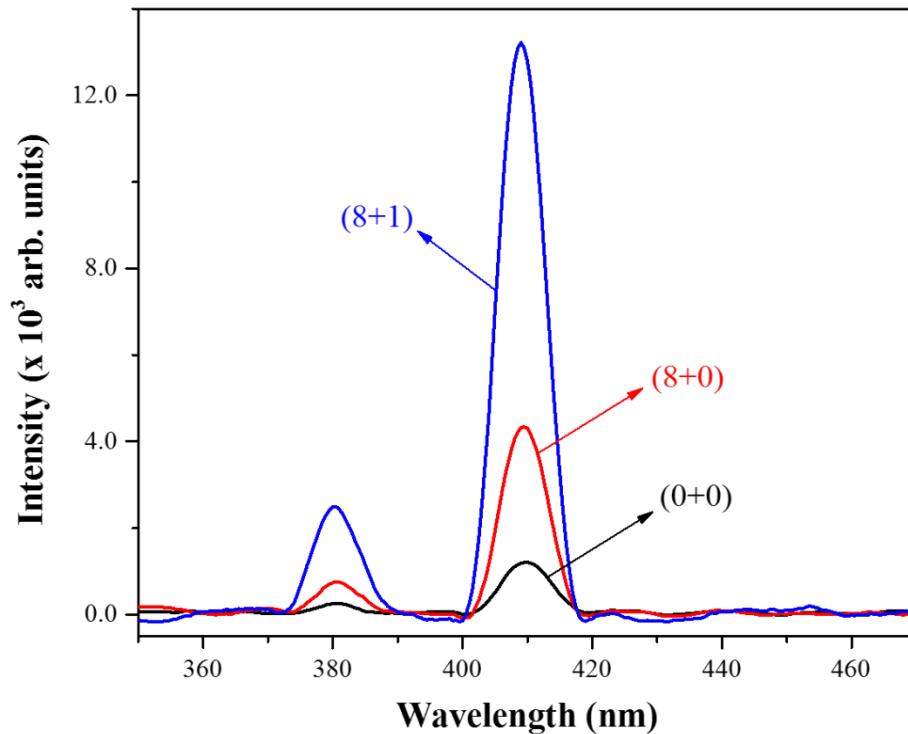

**Figure S6.** Up-conversion luminescence spectra of the  $\text{NaYF}_4:\text{Yb,Er}/\text{SiO}_2$  UCNPs dispersed on Si only (0+0), on Si with 8 min Au coating (8+0), and Si with 8 min bottom and 1 min top Au coating (8+1) configuration, under  $2 \text{ Wcm}^{-2}$  power excitation. The figure shows enhancement of the blue emissions at 383, and 410 nm when using the gold sandwich where multiphoton ( $n>3$ ) absorption processes were observed.

**Table 1.** Er doped UCNPs emission enhancement at 540 nm emission only,

| Geometry      | Size of UCNP nanostructure (nm) | Plasmonic structure | Plasmonic material | Enhancement factor | Reference |
|---------------|---------------------------------|---------------------|--------------------|--------------------|-----------|
| Core NP       | 65                              | Pillars             | Au                 | 2.2                | 1         |
| Core NP       | 30                              | Wire                | Ag                 | 2.3                | 2         |
| Core NP       | 30                              | Sphere              | Au                 | 4.8                | 3         |
| Core NP       | 30                              | Island              | Au                 | 5.1                | 4         |
| Core NP       | 40                              | Rods & spacer       | Au                 | 22.6               | 5         |
| Core NP       | 300                             | Platelets           | Ag                 | 22                 | 6         |
| Core NP       | 32                              | Grating             | Ag                 | 25                 | 7         |
| Core-shell NP | 45                              | Particles           | Ag                 | 14.4               | 8         |
| Core-shell NP | 40                              | Particles           | Au                 | 9.59               | 9         |
| Core-shell NP | 50                              | Spheres             | Ag                 | 4                  | 10        |
| Core-shell NP | 30                              | Shell               | Au                 | 2.5                | 11        |
| Core-shell NP | 90                              | Shell               | Au                 | 21                 | 12        |
| Core-shell NP | 50                              | Shell & rod         | Au                 | 6.5                | 13        |
| Thin film     | $\sim 75 \times 400$            | Island              | Ag                 | 3.3                | 14        |
| Thin film     | 5 – 15                          | Island              | Ag                 | 10.1               | 15        |

## References

- [1] H. P. Paudel, L. Zhong, K. Bayat, M. F. Baroughi, S. Smith, C. Lin, C. Jiang, M. T. Berry, P. S. May, *J. Phys. Chem. C.*, 2011, **115**, 19028.
- [2] W. Feng, L. D. Sun, C. H. Yan, *Chem. Comm.*, 2009, **29**, 4393.
- [3] S. Schietinger, T. Aichele, H. Q. Wang, T. Nann, O. Benson, *Nano Lett.*, 2010, **10**, 134.
- [4] H. Zhang, D. Xu, Y. Huang, X. F. Duan, *Chem. Comm.*, 2011, **47**, 979.
- [5] A. L. Feng, M. Li You, L. Tian, S. Singamaneni, M. Liu, Z. Duan, T. J. Lu, F. Xu, M. Lin, *Sci. Rep.*, 2015, **5**, 7779.
- [6] Y. L. Wang, N. Mohammadi Estakhri, A. Johnson, H. Y. Li, L. X. Xu, Z. Zhang, A. Alù, Q. Q. Wang, C. K. Shih, *Sci. Rep.*, 2015, **5**, 10196.
- [7] D. Lu, S. K. Cho, S. Ahn, L. Brun, C. J. Summers, W. Park, *ACS Nano*, 2014, **8**, 7780.

- [8] P. Yuan, Y. H. Lee, M. K. Gnanasammandhan, Z. Guan, Y. Zhang, Q. Xu, *Nanoscale*, 2012, **4**, 5132.
- [9] W. Ge, X. R. Zhang, M. Liu, Z. W. Lei, R. J. Knize, Y. Lu, *Theranostics*, 2013, **3**, 282.
- [10] F. Zhang, G. B. Braun, Y. Shi, Y. Zhang, X. Sun, N. O. Reich, D. Zhao, G. Stucky, *J Am. Chem. Soc.*, 2010, **132**, 2850.
- [11] A. Priyam, N. M. Idris, Y. Zhang, *J. Mater. Chem.*, 2011, **22**, 960.
- [12] P. Kannan, F. A. Rahim, X. Teng, R. Chen, H. Sun, L. Huang, D. H. Kim, *RSC Adv.*, 2013, **3**, 7718.
- [13] C. Zhang, J. Lee, *J. Phys. Chem. C*, 2013, **117**, 15253.
- [14] J. Shen, Z. Q. Li, Y. R. Chen, X. H. Chen, Y. W. Chen, Z. Sun, S. M. Huang, *Appl. Surf. Sci.*, 2013, **270**, 712.
- [15] Y. Wu, X. Shen, S. Dai, Y. Xu, F. Chen, C. Lin, T. Xu, Q. Nie, *J. Phys. Chem. C*, 2011, **115**, 25040.
